# Supplementary material for: Quantification and correlates of tuberculosis stigma along the tuberculosis testing and treatment cascades in South Africa: a cross-sectional study
Source: PubMed Central journal article supplement (PMC7579945; doi:10.1186/s40249-020-00762-8), 2020-10-22
Supplement: 40249_2020_762_MOESM1_ESM.pdf [file 40249_2020_762_MOESM1_ESM.pdf]

**TB STIGMA CODE BOOK**

| #                                               | Field Label                                                     | Field Attributes                                                                                                                      |
|-------------------------------------------------|-----------------------------------------------------------------|---------------------------------------------------------------------------------------------------------------------------------------|
| <b>Sociodemographics</b>                        |                                                                 |                                                                                                                                       |
| 1                                               | District                                                        | 1= BCM<br>2= Zululand                                                                                                                 |
| 2                                               | What is your race?                                              | 1= White<br>2= Black<br>3= Indian<br>4= Colored<br>5= Other, specify                                                                  |
| 3                                               | Are you male or female?                                         | 1= Female<br>2= Male                                                                                                                  |
| 4                                               | What is your relationship status?                               | 1= Single<br>2= In a relationship, but unmarried (living together)<br>3= Married<br>4= Separated<br>5= Divorced<br>6= Widowed         |
| 5                                               | What is the highest level of education that you have completed? | 1= None<br>2= Grade 7 (primary)<br>3= Grade 8 to 11 (before matric)<br>4= Grade 12<br>5= Tertiary                                     |
| 6                                               | What is your employment status?                                 | 1= Employed full-time<br>2= Employed part-time<br>3= Self-employed<br>4= Unemployed                                                   |
| 7                                               | Where do you stay?                                              | 1= Rural<br>2= Farming area<br>3= Small town<br>4= Large city                                                                         |
| 8                                               | Who do you currently stay with?                                 | 1= Family<br>2= Living with friends<br>3= Living alone                                                                                |
| 9                                               | Where do you get money to meet your basic monthly needs?        | 1= Government grant<br>2= Salary/Wages from employer<br>3= Profits from own business<br>4= Partner/spouse<br>5= Children<br>6= Family |
| 10                                              | What is your total household income per month?                  | 1= Under R5000<br>2= R5000 – R10000<br>3= R10000 – R20000<br>4= R20000 – R30000<br>5= More than R30000<br>6= Don't want to answer     |
| 11                                              | Have you ever had TB in the past?                               | 1= Never<br>2= Yes, less than 2 years ago<br>3= Yes, more than 2 years ago                                                            |
| 12                                              | Do you know anyone who currently has TB?                        | 0= No<br>1= Yes                                                                                                                       |
| 13                                              | Have you been tested for HIV?                                   | 0= No<br>1= Yes<br>3= I don't know                                                                                                    |
| 14                                              | Would you mind telling us the results?                          | 1= Positive<br>2= Negative<br>3= Does not want to disclose                                                                            |
| <b>Multidimensional Scale of Social Support</b> |                                                                 |                                                                                                                                       |

|    |                                                                  |                                                                                                                                                         |
|----|------------------------------------------------------------------|---------------------------------------------------------------------------------------------------------------------------------------------------------|
| 15 | There is a special person who is around when I am in need.       | 1= Very strongly disagree<br>2= Strongly disagree<br>3= Mildly disagree<br>4= Neutral<br>5= Mildly agree<br>6= Strongly agree<br>7= Very strongly agree |
| 16 | There is a special person whom I can share joys and sorrows with | 1= Very strongly disagree<br>2= Strongly disagree<br>3= Mildly disagree<br>4= Neutral<br>5= Mildly agree<br>6= Strongly agree<br>7= Very strongly agree |
| 17 | My family really tries to help me.                               | 1= Very strongly disagree<br>2= Strongly disagree<br>3= Mildly disagree<br>4= Neutral<br>5= Mildly agree<br>6= Strongly agree<br>7= Very strongly agree |
| 18 | I get the emotional help & support I need from my family.        | 1= Very strongly disagree<br>2= Strongly disagree<br>3= Mildly disagree<br>4= Neutral<br>5= Mildly agree<br>6= Strongly agree<br>7= Very strongly agree |
| 19 | I have a special person who is a real source of comfort to me.   | 1= Very strongly disagree<br>2= Strongly disagree<br>3= Mildly disagree<br>4= Neutral<br>5= Mildly agree<br>6= Strongly agree<br>7= Very strongly agree |
| 20 | My friends really try to help me.                                | 1= Very strongly disagree<br>2= Strongly disagree<br>3= Mildly disagree<br>4= Neutral<br>5= Mildly agree<br>6= Strongly agree<br>7= Very strongly agree |
| 21 | I can count on my friends when things go wrong.                  | 1= Very strongly disagree<br>2= Strongly disagree<br>3= Mildly disagree<br>4= Neutral<br>5= Mildly agree<br>6= Strongly agree<br>7= Very strongly agree |
| 22 | I can talk about my problems with my family.                     | 1= Very strongly disagree<br>2= Strongly disagree<br>3= Mildly disagree<br>4= Neutral<br>5= Mildly agree<br>6= Strongly agree<br>7= Very strongly agree |
| 23 | I have friends with whom I can share my joys and sorrows.        | 1= Very strongly disagree<br>2= Strongly disagree<br>3= Mildly disagree<br>4= Neutral                                                                   |

|                                          |                                                                               |                                                                                                                                                         |
|------------------------------------------|-------------------------------------------------------------------------------|---------------------------------------------------------------------------------------------------------------------------------------------------------|
|                                          |                                                                               | 5= Mildly agree<br>6= Strongly agree<br>7= Very strongly agree                                                                                          |
| 24                                       | There is a special person in my life who cares about my feelings.             | 1= Very strongly disagree<br>2= Strongly disagree<br>3= Mildly disagree<br>4= Neutral<br>5= Mildly agree<br>6= Strongly agree<br>7= Very strongly agree |
| 25                                       | My family is willing to help me make decisions.                               | 1= Very strongly disagree<br>2= Strongly disagree<br>3= Mildly disagree<br>4= Neutral<br>5= Mildly agree<br>6= Strongly agree<br>7= Very strongly agree |
| 26                                       | I can talk about my problems with my friends.                                 | 1= Very strongly disagree<br>2= Strongly disagree<br>3= Mildly disagree<br>4= Neutral<br>5= Mildly agree<br>6= Strongly agree<br>7= Very strongly agree |
| <b>HIV Stigma Scale (Kalichman 2005)</b> |                                                                               |                                                                                                                                                         |
| 27                                       | People who have AIDS are dirty                                                | 0= Strongly disagree<br>1= Disagree<br>2= Agree<br>3= Strongly agree                                                                                    |
| 28                                       | People who have AIDS are cursed                                               | 0= Strongly disagree<br>1= Disagree<br>2= Agree<br>3= Strongly agree                                                                                    |
| 29                                       | People who have AIDS should be ashamed                                        | 0= Strongly disagree<br>1= Disagree<br>2= Agree<br>3= Strongly agree                                                                                    |
| 30                                       | It is safe for people with AIDS to work with children                         | 0= Strongly disagree<br>1= Disagree<br>2= Agree<br>3= Strongly agree                                                                                    |
| 31                                       | People with AIDS must expect some restrictions on their freedom               | 0= Strongly disagree<br>1= Disagree<br>2= Agree<br>3= Strongly agree                                                                                    |
| 32                                       | A person with AIDS must have done something wrong and deserves to be punished | 0= Strongly disagree<br>1= Disagree<br>2= Agree<br>3= Strongly agree                                                                                    |
| 33                                       | People with HIV must be isolated                                              | 0= Strongly disagree<br>1= Disagree<br>2= Agree<br>3= Strongly agree                                                                                    |
| 34                                       | I do not want to be friends with someone who has AIDS                         | 0= Strongly disagree<br>1= Disagree<br>2= Agree<br>3= Strongly agree                                                                                    |
| 35                                       | People with AIDS should not be allowed to work                                | 0= Strongly disagree<br>1= Disagree<br>2= Agree                                                                                                         |

|                                              |                                                                                               |                                                                      |
|----------------------------------------------|-----------------------------------------------------------------------------------------------|----------------------------------------------------------------------|
|                                              |                                                                                               | 3= Strongly agree                                                    |
| <b>Attributable HIV Stigma (Visser 2008)</b> |                                                                                               |                                                                      |
| 36                                           | Most people think that getting HIV is a punishment for bad behaviour                          | 0= Strongly disagree<br>1= Disagree<br>2= Agree<br>3= Strongly agree |
| 37                                           | Most people think that having HIV is just a matter of bad luck                                | 0= Strongly disagree<br>1= Disagree<br>2= Agree<br>3= Strongly agree |
| 38                                           | Most people think less of someone because they have HIV                                       | 0= Strongly disagree<br>1= Disagree<br>2= Agree<br>3= Strongly agree |
| 39                                           | Most people would not like someone with HIV to be living next door                            | 0= Strongly disagree<br>1= Disagree<br>2= Agree<br>3= Strongly agree |
| 40                                           | Most people would reject the friendship of someone with HIV                                   | 0= Strongly disagree<br>1= Disagree<br>2= Agree<br>3= Strongly agree |
| 41                                           | Most people feel that it is safe for a person with HIV to look after somebody else's children | 0= Strongly disagree<br>1= Disagree<br>2= Agree<br>3= Strongly agree |
| 42                                           | Most people would not date a person if they know that he/she has HIV                          | 0= Strongly disagree<br>1= Disagree<br>2= Agree<br>3= Strongly agree |
| 43                                           | Most people are afraid to be around people with HIV                                           | 0= Strongly disagree<br>1= Disagree<br>2= Agree<br>3= Strongly agree |
| 44                                           | Most people feel that if you have HIV it is your own fault                                    | 0= Strongly disagree<br>1= Disagree<br>2= Agree<br>3= Strongly agree |
| 45                                           | Most employers would not hire someone with HIV to work for them                               | 0= Strongly disagree<br>1= Disagree<br>2= Agree<br>3= Strongly agree |
| 46                                           | Most people would not drink from a tap if a person with HIV had just drunk from it            | 0= Strongly disagree<br>1= Disagree<br>2= Agree<br>3= Strongly agree |
| 47                                           | Most people believe that if you have HIV you must have done something wrong to deserve it     | 0= Strongly disagree<br>1= Disagree<br>2= Agree<br>3= Strongly agree |
| 48                                           | Most people believe that someone with HIV should be ashamed of themselves                     | 0= Strongly disagree<br>1= Disagree<br>2= Agree<br>3= Strongly agree |
| 49                                           | Most people feel uncomfortable around people with HIV                                         | 0= Strongly disagree<br>1= Disagree<br>2= Agree<br>3= Strongly agree |
| <b>Mental Health Assessment (PHQ8)</b>       |                                                                                               |                                                                      |
| 50                                           | Little interest or pleasure in doing things                                                   | 0= Not at all                                                        |

|                     |                                                                                                                                                                           |                                                                                                                                                                                                                                  |
|---------------------|---------------------------------------------------------------------------------------------------------------------------------------------------------------------------|----------------------------------------------------------------------------------------------------------------------------------------------------------------------------------------------------------------------------------|
|                     |                                                                                                                                                                           | 1= Several days<br>2= More than half the days<br>3= Nearly every day                                                                                                                                                             |
| 51                  | Feeling down, depressed or hopeless                                                                                                                                       | 0= Not at all<br>1= Several days<br>2= More than half the days<br>3= Nearly every day                                                                                                                                            |
| 52                  | Trouble falling asleep, staying asleep, or sleeping too much                                                                                                              | 0= Not at all<br>1= Several days<br>2= More than half the days<br>3= Nearly every day                                                                                                                                            |
| 53                  | Feeling tired or having little energy                                                                                                                                     | 0= Not at all<br>1= Several days<br>2= More than half the days<br>3= Nearly every day                                                                                                                                            |
| 54                  | Poor appetite or overeating                                                                                                                                               | 0= Not at all<br>1= Several days<br>2= More than half the days<br>3= Nearly every day                                                                                                                                            |
| 55                  | Feeling bad about yourself - or that you're a failure or have let yourself or your family down                                                                            | 0= Not at all<br>1= Several days<br>2= More than half the days<br>3= Nearly every day                                                                                                                                            |
| 56                  | Trouble concentrating on things, such as reading the newspaper or watching television                                                                                     | 0= Not at all<br>1= Several days<br>2= More than half the days<br>3= Nearly every day                                                                                                                                            |
| 57                  | Moving or speaking so slowly that other people could have noticed. Or, the opposite - being so fidgety or restless that you have been moving around a lot more than usual | 0= Not at all<br>1= Several days<br>2= More than half the days<br>3= Nearly every day                                                                                                                                            |
| <b>TB Knowledge</b> |                                                                                                                                                                           |                                                                                                                                                                                                                                  |
| 58                  | What do you think causes TB?                                                                                                                                              | 1= I don't know<br>2= Infection/Virus/Bacteria<br>3= Witchcraft<br>4= Infection from others<br>5= Smoking<br>6= Exposure to the cold<br>7= Drinking alcohol<br>8= Weak body<br>9= Other, specify                                 |
| 59                  | How is TB spread from person to person?                                                                                                                                   | 1= I don't know<br>2= Physical contact (shaking hands, kissing, and so on)<br>3= Sharing foods/drinks/utensils<br>4= Coughing/sneezing/talking/singing<br>5= Poor sanitation/sharing toilet seats<br>6= Sex<br>7= Other, specify |
| 60                  | What are the signs and symptoms of TB?                                                                                                                                    | 1= I don't know<br>2= Fever<br>3= Weight loss<br>4= Coughing<br>5= Night sweats<br>6= Coughing up blood<br>7= Loss of appetite<br>8= Chest pain<br>9= Breathlessness<br>10 = Feeling weak<br>11= Other, specify                  |

|                                    |                                                                |                                                                      |
|------------------------------------|----------------------------------------------------------------|----------------------------------------------------------------------|
| 61                                 | Can TB be cured?                                               | 0= No<br>1= Yes<br>3= I don't know                                   |
| 62                                 | Does having HIV/AIDS increase the chances of getting TB?       | 0= No<br>1= Yes<br>3= I don't know                                   |
| 63                                 | Does having TB increase the chances of having HIV/AIDS?        | 0= No<br>1= Yes<br>3= I don't know                                   |
| <b>Van Rie Community TB Stigma</b> |                                                                |                                                                      |
| 64                                 | People may not want to eat or drink with friends who have TB   | 0= Strongly disagree<br>1= Disagree<br>2= Agree<br>3= Strongly agree |
| 65                                 | People may not want to eat or drink with relatives who have TB | 0= Strongly disagree<br>1= Disagree<br>2= Agree<br>3= Strongly agree |
| 66                                 | People feel uncomfortable about being near those with TB       | 0= Strongly disagree<br>1= Disagree<br>2= Agree<br>3= Strongly agree |
| 67                                 | People do not want those with TB playing with their children   | 0= Strongly disagree<br>1= Disagree<br>2= Agree<br>3= Strongly agree |
| 68                                 | People keep their distance from people with TB                 | 0= Strongly disagree<br>1= Disagree<br>2= Agree<br>3= Strongly agree |
| 69                                 | People do not want to talk to others with TB                   | 0= Strongly disagree<br>1= Disagree<br>2= Agree<br>3= Strongly agree |
| 70                                 | People are afraid of those with TB                             | 0= Strongly disagree<br>1= Disagree<br>2= Agree<br>3= Strongly agree |
| 71                                 | People try not to touch others with TB                         | 0= Strongly disagree<br>1= Disagree<br>2= Agree<br>3= Strongly agree |
